# Supplementary material for: Electrogenerated chemiluminescence resonance energy transfer between ZnGa2O4/g-C3N4 and gold nanoparticles/graphene and its application in the detection of thrombin
Source: Royal Society of Chemistry journal article supplement (doi:10.1039/d0an01558j), 2020-01-01
Supplement: d0an01558j1.pdf [file d0an01558j1.pdf]

## Supporting Materials

Electrogenerated chemiluminescence resonance energy transfer  
between  $\text{ZnGa}_2\text{O}_4/\text{g-C}_3\text{N}_4$  and gold nanoparticles/graphene and  
its application in the detection of thrombin

Hui Liu, Hao Yin, TingTing Yang, HouCheng Ding, YongPing Dong\*

*School of Chemistry and Chemical Engineering, Anhui Province Key Laboratory  
of Coal Clean Conversion and High Valued Utilization, Hexian Development Institute  
of Chemical Industry, Anhui University of Technology, Maanshan 243002, China*

**Electrochemical and ECL measurements.** The electrochemical measurements were recorded with CHI 660D electrochemical workstation (CH Instruments Co., China). A conventional three-electrode system was adopted, including a modified GCE as the working electrode, a platinum wire as the counter electrode and a saturated calomel electrode (SCE) as the reference electrode, respectively. Electrochemical impedance spectroscopy (EIS) was carried out at open circuit potential in 0.1 mol L<sup>-1</sup> KCl solution containing K<sub>3</sub>[Fe(CN)<sub>6</sub>]/K<sub>4</sub>[Fe(CN)<sub>6</sub>] (5 mM, 1:1). The frequency range was selected as 0.01 Hz-100 kHz, and potential amplitude was 5 mV. The ECL measurement was carried out on a model MPI-M electrochemiluminescence analyzer (Xi'An Remax Electronic Science & Technology Co. Ltd., China) at room temperature, and the voltage of the photomultiplier tube (PMT) was set at -800V during the detection. A commercial 5 mL cylindroid glass cell was used as ECL cell and was placed directly in front of the PMT.

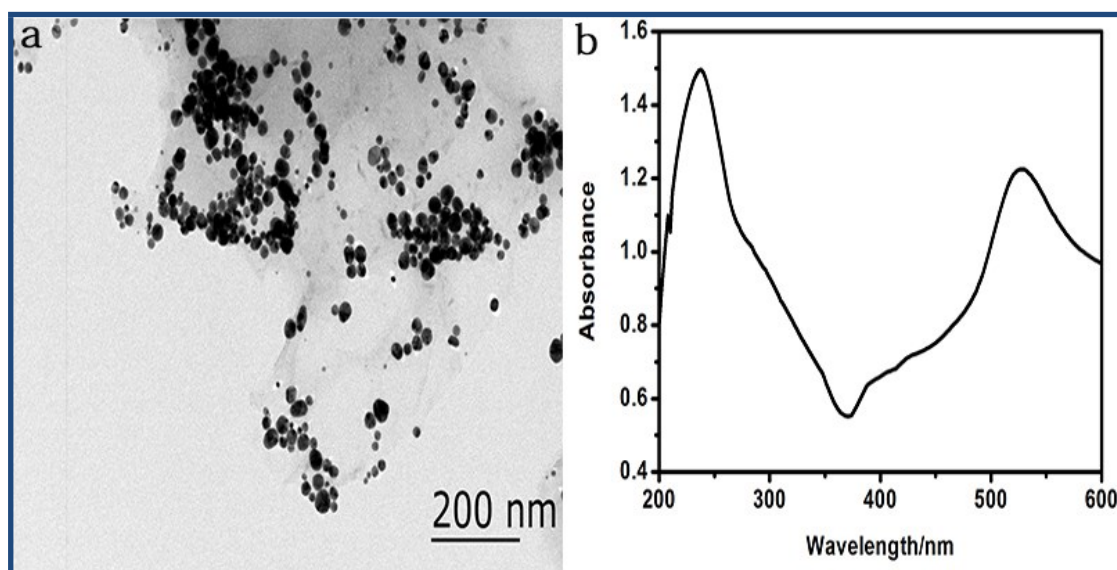

**Fig.S1** TEM image (a) and UV-vis absorption spectrum (b) of gold nanoparticles/graphene composite

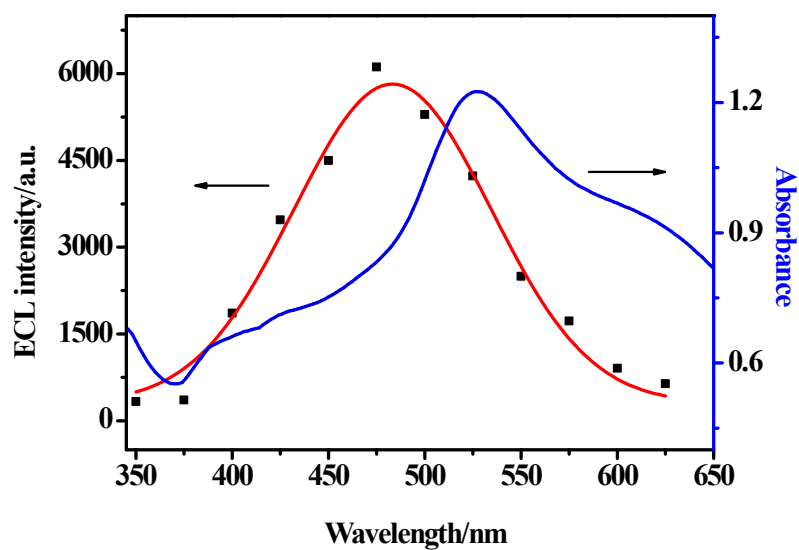

**Fig.S2** ECL spectrum of  $\text{ZnGa}_2\text{O}_4/\text{g-C}_3\text{N}_4$  nanocomposites and UV-vis absorption spectrum of gold nanoparticles/graphene nanocomposites.

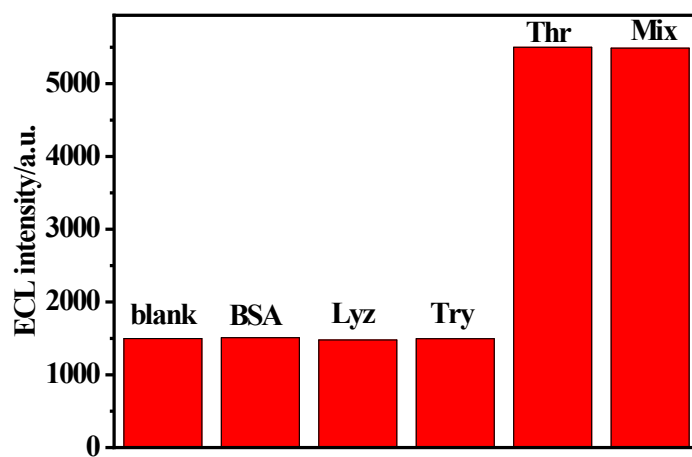

**Fig.S3** Selectivity of the fabricated sensor.

**Table S1** Comparison of different ECL biosensors for the detection of thrombin.

| ECL system                                                        | Linear range (pM) | Detection limit (pM) | Ref.      |
|-------------------------------------------------------------------|-------------------|----------------------|-----------|
| CdTe QDs-S <sub>2</sub> O <sub>8</sub> <sup>2-</sup>              | 0.5 -800          | 0.35                 | 1         |
| Ru(phen) <sub>3</sub> <sup>2+</sup> -TPA                          | 0.05 -50          | 0.02                 | 2         |
| Ru(bpy) <sub>3</sub> <sup>2+</sup> -TPA                           | 0.05 -100         | 0.008                | 3         |
| Ru(bpy) <sub>3</sub> <sup>2+</sup> -TPA                           | 0.90 -226         | 0.40                 | 4         |
| Luminol-H <sub>2</sub> O <sub>2</sub>                             | 5-50000           | 1.7                  | 5         |
| Luminol-QDs                                                       | 0.01-100          | 0.0014               | 6         |
| Pd NCs-TPA                                                        | 0.01-100          | 0.00676              | 7         |
| RuAg/SiO <sub>2</sub> NPs                                         | 0.002-2           | 0.001                | 8         |
| ZnGa <sub>2</sub> O <sub>4</sub> /g-C <sub>3</sub> N <sub>4</sub> | 0.00137-27.4      | 0.00055              | This work |

[1] Y. Chen, B. Y. Jiang, Y. Xiang, Y. Q. Chai and R. Yuan, *Chem. Commun.* 2011, **47**, 7758-7760.

[2] X. B. Yin, Y. Y. Xin and Y. Zhao, *Anal. Chem.* 2009, **81**, 9299-9305.

[3] J. Zhang, P. P. Chen, X. Y. Wu, J. H. Chen, L. J. Xu, G. N. Chen and F. F. Fu, *Biosens. Bioelectron.* 2011, **26**, 2645-2650.

[4] X. Y. Wang, A. Gao, C. C. Lu, X. W. He and X. B. Yin, *Biosens. Bioelectron.* 2013, **48**, 120-125.

[5] F. Li and H. Cui, *Biosens. Bioelectron.* 2013, **39**, 261-267.

[6] Y. P. Dong, T. T. Gao, Y. Zhou and J. J. Zhu, *Anal. Chem.* 2014, **86**, 11373-11379.

[7] H. M. Wang, Y. Fang, P. X. Yuan, A. J. Wang, X. L. Luo and J. J. Feng, *Electrochim. Acta*, 2019, **310**, 195-202.

[8] Y. Q. Sun, X. Jin, M. Gong, L. R. Lv, L. Y. Li, M. Jiang, X. Y. Wang and J. Xu, *Electroanalysis*, 2019, **31**, 1-11.
